# Supplementary material for: Efficacy, Safety, and Patient-Reported Outcomes in Patients with Moderate-to-Severe Plaque Psoriasis Treated with Brodalumab for 5 Years in a Long-Term, Open-Label, Phase II Study
Source: PubMed Central journal article supplement — Am J Clin Dermatol. 2019 Nov 14;20(6):863–71. doi: 10.1007/s40257-019-00466-2 (PMC6872506; doi:10.1007/s40257-019-00466-2), 2019-11-14
Supplement: 40257_2019_466_MOESM1_ESM.pdf [file 40257_2019_466_MOESM1_ESM.pdf]

**Efficacy, Safety, and Patient-Reported Outcomes  
in Patients With Moderate-to-Severe Plaque Psoriasis Treated With Brodalumab for 5  
Years in a Long-Term, Open-Label, Phase 2 Study**

Mark G. Lebwohl, Andrew Blauvelt, Alan Menter, Kim A. Papp, Scott Guenther,  
Radhakrishnan Pillai, Robert J. Israel, Abby Jacobson

**Journal:** *American Journal of Clinical Dermatology*

**Correspondence and reprint requests to:**

Mark G. Lebwohl

Icahn School of Medicine at Mount Sinai

5 East 98th St, 5th Floor

New York, NY 10029

Telephone: 212-241-9728

Email: [Lebwohl@aol.com](mailto:Lebwohl@aol.com)

**Program used to create figures:** Adobe Illustrator

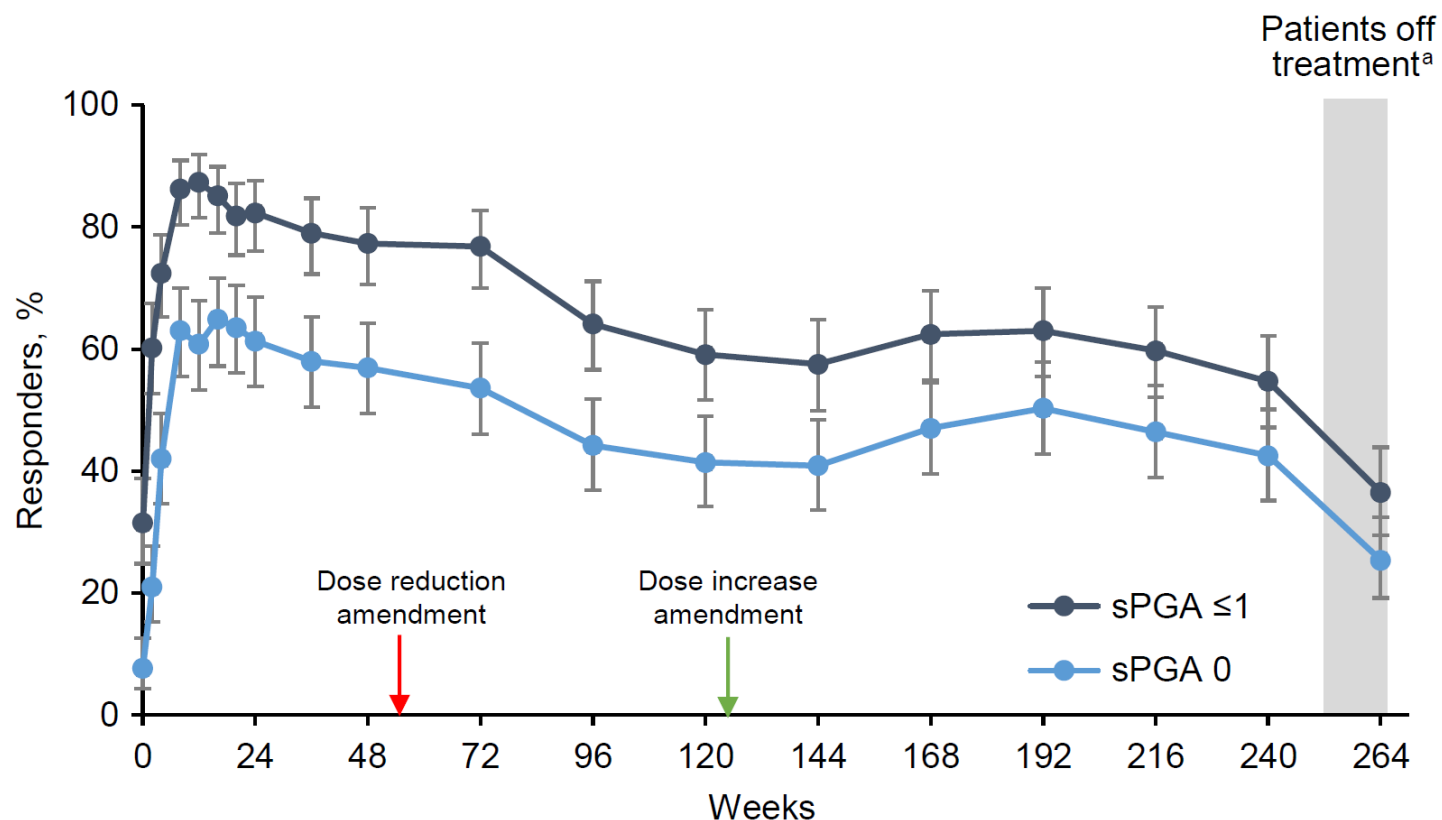

**Supplemental Figure 1.** Percentage of patients with sPGA score of 0 (clear) or  $\leq 1$  (clear or almost clear) at each study visit (N=181).

Nonresponder imputation analysis. Error bars show the 95% confidence interval. The red arrow indicates introduction of the protocol

amendment that allowed dose reductions to brodalumab 140 mg for patients weighing  $\leq 100$  kg. The green arrow indicates introduction of the

protocol amendment that allowed dose increases to brodalumab 210 mg for patients demonstrating an insufficient response with the 140-mg

dose. n, number of patients who had a valid measurement value at the specified week; sPGA 0 and sPGA  $\leq 1$ , static physician's global assessment

score of 0 and  $\leq 1$ . <sup>a</sup>At week 264, patients had been off treatment for  $\geq 6$  weeks.

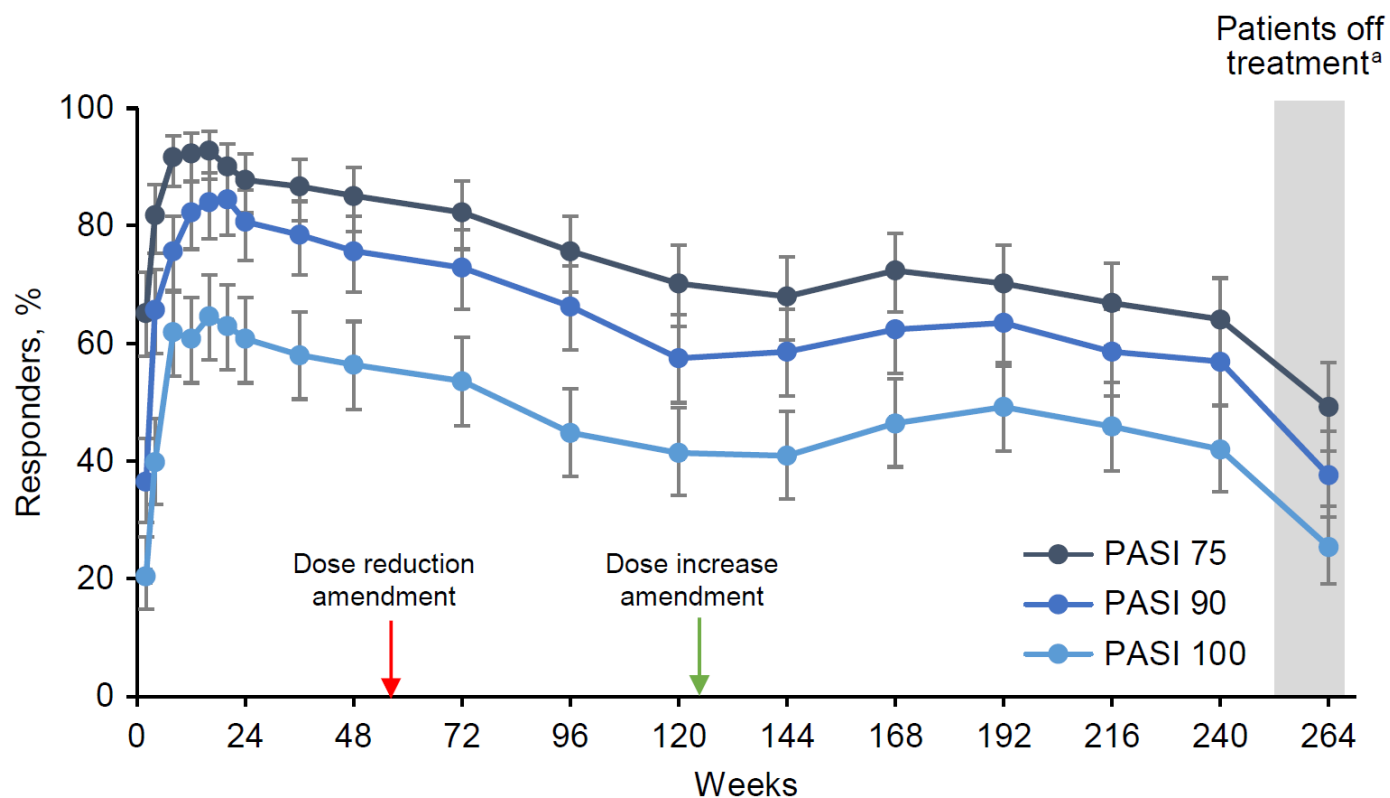

**Supplemental Figure 2.** Percentage of patients with skin clearance response measured by PASI at each study visit (N=181). Nonresponder imputation analysis. Error bars show the 95% confidence interval. The red arrow indicates introduction of the protocol amendment that allowed dose reductions to brodalumab 140 mg for patients weighing  $\leq 100$  kg. The green arrow indicates introduction of the protocol amendment that allowed dose increases to brodalumab 210 mg for patients demonstrating an insufficient response with the 140-mg dose. n, number of patients who had a valid measurement value at the specified week; PASI 75, 90, and 100, psoriasis area and severity index 75%, 90%, and 100% improvement. <sup>a</sup>At week 264, patients had been off treatment for  $\geq 6$  weeks.
